# Supplementary material for: Lampreys, the jawless vertebrates, contain three Pax6 genes with distinct expression in eye, brain and pancreas
Source: PubMed Central journal article supplement (PMC6925180; doi:10.1038/s41598-019-56085-8), 2019-12-20
Supplement: 41598_2019_56085_MOESM1_ESM.pdf [file 41598_2019_56085_MOESM1_ESM.pdf]

## Supplementary Material

### **Lampreys, the jawless vertebrates, contain three *Pax6* genes with distinct expression in eye, brain and pancreas**

Vydianathan Ravi<sup>1</sup>, Shipra Bhatia<sup>2</sup>, Prashant Shingate<sup>1</sup>, Boon-Hui Tay<sup>1</sup>, Byrappa Venkatesh<sup>1,3\*</sup>,  
Dirk A. Kleinjan<sup>2,4\*</sup>

**Table S1:** eGFP expression in F1 zebrafish embryos in four independent stable reporter transgenic lines.

| <b>Cis Regulatory Element (CRE)</b> | <b>Reporter cassette</b>    | <b>Total number of stable transgenic lines analysed</b> | <b>Sites of reporter expression (in number of lines out of the total)</b>         | <b>Tissue-specific activity observed in 100% of transgenic lines</b> |
|-------------------------------------|-----------------------------|---------------------------------------------------------|-----------------------------------------------------------------------------------|----------------------------------------------------------------------|
| LjPax6 $\beta$ _NRE element         | Minimal gata2 promoter-eGFP | 4                                                       | Retina (4/4; 100%)<br>Heart (1/4; 25%)<br>Yolk (1/4; 25%)<br>Forebrain (1/4; 25%) | Retina                                                               |

**Table S2.** Primer pairs used for the qRT-PCR of Japanese lamprey *Pax6* genes

| Gene           | Primer Name              | Primer Sequences (5'→3')         |
|----------------|--------------------------|----------------------------------|
| Pax6- $\alpha$ | LjPax6 $\alpha$ _ex12_F2 | 5'-TACGATACGTACACGCCGCCACACA-3'  |
|                | LjPax6 $\alpha$ _3utr_R1 | 5'-ACCGCCCATCGCAGGAGAGAGGC-3'    |
| Pax6- $\beta$  | LjPax6 $\beta$ _ex12_F2  | 5'-TACTCGTGCATGCTCCCCACGAG-3'    |
|                | LjPax6 $\beta$ _3utr_R2  | 5'-AGGCAGACAGGTAGGAGGAGCCA-3'    |
| Pax6- $\gamma$ | LjPax6 $\gamma$ _ex12_F2 | 5'-TCGAAGCGTACTCAAACAATCAGCC-3'  |
|                | LjPax6 $\gamma$ _3utr_R2 | 5'-TACTGGAGCCTGGACCAGTAGTGTGC-3' |
| $\beta$ -Actin | LjBACTIN.F               | 5'-ATCGTGCGTGACATCAAGGAGAAG-3'   |
|                | LjBACTIN.R               | 5'-GCGTACAGGTCCTTGCGGATGTC-3'    |

**Intron1**

LjPax6 $\alpha$  ATGAACAACAgtgag.....gacagGCCACAGCGGC  
M N N S H S G  
LjPax6 $\beta$  TTTTCGTCAAGgtgag.....gccagGCCACAGCGGC  
F R Q G H S G  
LjPax6 $\gamma$  TATCAAAAAGgcaag.....attagGTCACAGCGGG  
Y Q K G H S G  
HsaPax6 ATGCAGAACAgtaag.....ctcagGTCACAGCGGA  
M Q N S H S G

**Intron2**

LjPax6 $\alpha$  ATCCTGCAGgtgag.....tgcagGTGTCCAAC  
I L Q V S N  
LjPax6 $\beta$  ATCCTGCAGgag.....cgagGTGTCTAAC  
I L Q V S N  
LjPax6 $\gamma$  CTACTGCAGgtgag.....cccagGTCTCCAAC  
L L Q V S N  
HsaPax6 ATTCTGCAGgtgat.....tgcagGTGTCCAAC  
I L Q V S N

**Intron3**

LjPax6 $\alpha$  ATCCCCAGCgtgag.....cacagGTCTCCTCC  
I P S V S S  
LjPax6 $\beta$  ATCCCCAGCgtgag.....cccagGTGTCTCCTCC  
I P S V S S  
LjPax6 $\gamma$  CTGCCCAGCgtgag.....cgagGTGTCTCCTCC  
L P S V S S  
HsaPax6 ATACCAAGCgtaag.....tgcagGTGTCTCCTCC  
I P S V S S

**Intron4**

LjPax6 $\alpha$  CTCTCAGCAGgtacg.....gggagGCTCCGCGGGG  
L S A G S A G  
LjPax6 $\beta$  CAGGGGCCAGgtggg.....cgagACGGGTGCGCG  
Q G P D G C A  
LjPax6 $\gamma$  GGCCTTCGgtgag.....gccagAGCTGGAGGGG  
G A F E L E G  
HsaPax6 CCTACGCAAGgtaaa.....tccagATGGCTGCCAG  
P T Q D G C Q

**Intron5**

LjPax6 $\alpha$  CTCGAGAAAAGgtggg.....tgcagAGTTCGAGAGG  
L E K E F E R  
LjPax6 $\beta$  CTCGAGAAAAGgtgag.....cccagAGTTCGAGCGG  
L E K E F E R  
LjPax6 $\gamma$  CTGGAGAAAAGgtgag.....tgtagAATTCGAACGG  
L E K E F E R  
HsaPax6 CTGGAGAAAAGgtgat.....ttcagAGTTTGAGAGA  
L E K E F E R

**Intron6**

LjPax6 $\alpha$  CGCATCCAGgtgag.....cacagGTGTGGTTC  
R I Q V W F  
LjPax6 $\beta$  CGCATCCAGgtgag.....cccagGTGTGGTTC  
R I Q V W F  
LjPax6 $\gamma$  AGGATCCAGgtaac.....ctcagGTGTGGTTC  
R I Q V W F  
HsaPax6 AGAATACAGgtacc.....tccagGTATGGTTT  
R I Q V W F

...contd.

**Intron7**

LjPax6 $\alpha$  GCGGCTCCCGgtacc.....ccaagGCGCGATGCTG  
 A A P G A M L  
 LjPax6 $\beta$  ATGCACCCAGgtgag.....cacagGTGCGATGCTG  
 M H P G A M L  
 LjPax6 $\gamma$  GCGCAACAAGgtcag.....tgcagGTCAGATGCTG  
 A Q Q G Q M L  
 HsaPax6 ACCACACCGGgtaat.....ctcagTTTCCTCCTTC  
 T T P V S S F

**Intron8**

LjPax6 $\alpha$  CCCGTGCAGgtgag.....cccagCCCGGCGTG  
 P V Q P G V  
 LjPax6 $\beta$  CCCATGCAGgtgag.....tccagGCGCCCATG  
 P M Q A P M  
 LjPax6 $\gamma$  CCCAGCCAGgtgca.....ctcagCCGACGTCC  
 P S Q P T S  
 HsaPax6 CCTATGCAAgtaag.....cacagCCCCCAGTC  
 P M Q P P V

**Intron9**

LjPax6 $\alpha$  TCCTCCACGGgtgag.....tacagGGCTCATCTCC  
 S S T G L I S  
 LjPax6 $\beta$  GGGTCCACAGgtaaa.....cccagGTCTCATCTCG  
 G S T G L I S  
 LjPax6 $\gamma$  GGATCCCAGgtgag.....tgtagGGATGCTGTCA  
 G S P G M L S  
 HsaPax6 ACTTCAACAGgtgag.....tctagGACTCATTTC  
 T S T G L I S

**Figure S1.** Comparison of exon-intron junctions of Japanese lamprey and human *Pax6* genes showing conservation of intron position and phase (also see Figure 2a). Intron numbering is based on the lamprey *Pax6 $\alpha$*  gene (see Figure 2a). Upper case letters denote the exonic sequence whereas the lowercase letters represent the introns. The encoded amino acids are shown below their respective codons.

```

      10      20      30      40      50      60      70
Lamprey_Pax6β_NRE  -----GTTGGCCGTTGGTCTAGATGATG--ATGA-----
Eshark_6.1_NRE    -----GCTAGAACCTTCGCATCTGTGAAAGTGTGAACTAAGTAGGACGCGCG--T
Coelacanth_Pax6_NRE -----AGTTTT-AATAAAGCGC-----
Human_PAX6_intron_4_NRE GCGCTGGTCCCGCGGAGCCAGATCCCCAAACGCCTGTCACTTCTCATCGAGTTGAGGCTCCGCGC

      80      90      100     110     120     130     140
Lamprey_Pax6β_NRE  -----TGATGGTGACGACGGTTTGTA---GGAAAGGAT--GGCGACAAGAGTTGTGGAGATGGAGG
Eshark_6.1_NRE    TCCCCCCAATGTGGTCCCCAGCCCTCGCCCCGGGGCAACCTTTGAAACGAAGCTTCTTTTAAAG
Coelacanth_Pax6_NRE GCC-----CCCGCAG--TTGTGCACGTATAAGCCTTTGGCTACC-----TTAAAATGAAGC
Human_PAX6_intron_4_NRE CCACCCGCGCCTTGGTGAGGGCCCCCCTCAGCCCCAAGCCTTCGGCTACC-----TGAAAACGCGGC

      150     160     170     180     190     200     210
Lamprey_Pax6β_NRE  AGGAAGGGCAGGGGGGGTGTAGAGAAAGAGAAAGGGGGGGGGTGAACCGTCGCCCATCGCCACT
Eshark_6.1_NRE    GGGGTAATGAGCGGAGAGTGGAGCGAGC---GATAGGACTATGAGTGATACACAAATGCCGAGAGAA--
Coelacanth_Pax6_NRE TTCCCTTGAAGGGTAAATGAGTGAATC---CAATTTAGTCTGAGTGATACTAAATGCCGAGAGAA--
Human_PAX6_intron_4_NRE TCCCTCGAAGGGAAACAAGTGCAGTT---CAATCTCGTCTGAGTGATCTACAAATAGGACGGAA--

      220     230     240     250     260     270     280
Lamprey_Pax6β_NRE  CGGCAGTGGCTCGCCCGGGTGGAAAAAAATCCACCCCCCCCCCACCACCACACCACTTG
Eshark_6.1_NRE    --AGAGACGTTTTATCATGCTACTATTTGTCGTG---ACGATGGCATTTTCA--
Coelacanth_Pax6_NRE --AGGTCGTTTTATCATGCTACTATTTGTCGTG-----ACGATGCAATTTTCAA
Human_PAX6_intron_4_NRE --AGGTCGTTTTATCACGGTCCCGTTTGTCTGT-----ACGATGCAATTTCCCG

      290     300     310     320     330     340     350
Lamprey_Pax6β_NRE  AAGCAAACCTTGTGACGCGATGTGACAAGGCTGGCAA-----TGCCGACTCTGCGCGCTGGAGCGTG
Eshark_6.1_NRE    AAGTAGAACACTGTCATAAAGTGACATGCCCTGCCAAGTGCTCTCACTGATCTTTTCAATTACCCCTTC
Coelacanth_Pax6_NRE AAGCAGACCACTGTCATAAAGTGACATGCCCTGCCAAGTGCTCCAACCTGATCTTTTCAATTAGCCCTCC
Human_PAX6_intron_4_NRE GAGCGGACCACTGTCACAAGTGACAAGGCTGCCACAAGCGCCCGACTGATCTTTTCAATTAGCCCTTC

      360     370     380     390     400     410     420
Lamprey_Pax6β_NRE  CCTAACGCGCCGTGACGACTCGGCTTATTTGGGAAAATTAGGCTCAAACCT--TGACGTCGGATCGCCTTT
Eshark_6.1_NRE    GTGCACGATCCACTGCGACTTCCGCTTATTTCCAGAAAATTAAGCTCAAATTTGACATGCGCCAGCTTT
Coelacanth_Pax6_NRE ATGCATGATCCAGGGCGACTTCCGCTTATTTCCAGAAAATTAAGCTCAAACCT--TGACGTCGGCTAGCTTT
Human_PAX6_intron_4_NRE ATGCATGATCCGGAGCGACTTCCGCTTATTTCCAGAAAATTAAGCTCAAACCT--TGACGTCGACGTAGTTTT

      430     440     450     460     470     480     490
Lamprey_Pax6β_NRE  ATTCGGAAGACAAATGTCACACCGCCCTCATCGTTCCACAGCTCCGCTTCCCCCCCCCAACTTATAT
Eshark_6.1_NRE    ATTTTCAAGACAAATGTCAGGAAAGCTCATCATTTTTTTTTCTCTCTCTCTCTCTCTCTCTCTCTCT
Coelacanth_Pax6_NRE ATTTTAAAGACAAATGTCAGAGAGGCTCATCATATTTTCC--CCCTCTCTATATTTGGAGCTTATT---
Human_PAX6_intron_4_NRE ATTTTAAAGACAAATGTCAGAGAGGCTCATCATATTTTCCCCCTCTTCTATATTTGGAGCTTATT---

      500     510     520     530     540     550     560
Lamprey_Pax6β_NRE  CCGGTCG-----GGGAGGAGCTTTGGAGTCCACTCGGAGGA
Eshark_6.1_NRE    CTCCCCCTTCTATATTTGGAGGCTTATTTATGCTAAGTGGCTAGGCTTTGGGAGCCAATTTAGCAAGG
Coelacanth_Pax6_NRE -----TATTGCTAAGGAGCCTAGAACTTTTGAAGTCAATTTAGCAGGA
Human_PAX6_intron_4_NRE -----TATTGCTAAGGAGCTCAGGCTCCGCGTCAATTTTACAGTA

      570     580     590     600     610     620     630
Lamprey_Pax6β_NRE  GTCTGCGGACGAAAGCGCGGCTGGCGCGCGCCCGTTGATCGCGCGCGCGGACACCCCCCCCCC
Eshark_6.1_NRE    CGCTGTTTGGAGAGGAGAAACAG-----GTCTAGC-----TAGAAGACAGCTTCTTCCA
Coelacanth_Pax6_NRE GGCTCCAAGGAGAGGAGAGCAG-----AGAAATAGAAAAGAACACAGTTTCTCCAGGAGGCTTCT
Human_PAX6_intron_4_NRE GGCTCCAAGGAGAGGAGAGGAG-----AGGAGAGGAGAGCTGAACAGGAGGCCACGCTTTTCTCT

      640     650     660     670     680     690     700
Lamprey_Pax6β_NRE  CCCCCAGTACCGTAGCAGCTTCGCTTCTCTCTGAGCCCTGAGCCAGATC--GGGAGATCGCCAGTT
Eshark_6.1_NRE    GGGAGAGGCGACAGGACCTGAGCTCAGGTTCCGAGTCTCAATACGCCCTTCAACTGATGCC-----
Coelacanth_Pax6_NRE GTAA-----ACCTCAGCTCAGGTTTGGAACTGAAACTAGTGG--CTTCTGTTATCTTACC
Human_PAX6_intron_4_NRE GGGAGGCTGCTATCTAAAGTCGGGGCTCAGGTTGGAGATTTTAAAGGAAGTGGAAATTTGCAATTTGCT

      710     720     730     740     750     760     770
Lamprey_Pax6β_NRE  TTATTTGTTCTTCTCTCTCGTAAAGCCACCCGTCGATTCGCG-----CTGCTGCTGTCTCTCCCC
Eshark_6.1_NRE    TTTTTTTTTTG---CTCTTAATAAGCCAA--AGAACAGATTGTGTTTTTTTAGTACATTTGGGTGTTTGC
Coelacanth_Pax6_NRE AATTGTA---
Human_PAX6_intron_4_NRE TTGTTGTCTTGTGTTTITGGGGAGGGG--ACTACAAA-----

      780     790     800
Lamprey_Pax6β_NRE  GCGTGAGTCCCGGACGCTGGC-----
Eshark_6.1_NRE    TAATTGATGCATGCGCCTTGCCATGCACA
Coelacanth_Pax6_NRE -----
Human_PAX6_intron_4_NRE -----

```

**Figure S2:** Sequence alignment of the conserved sequence element from the Lamprey Pax6β locus with the neuroretina enhancer sequences from human, coelacanth and elephant shark. The most highly conserved core of the element is highlighted with a red box.

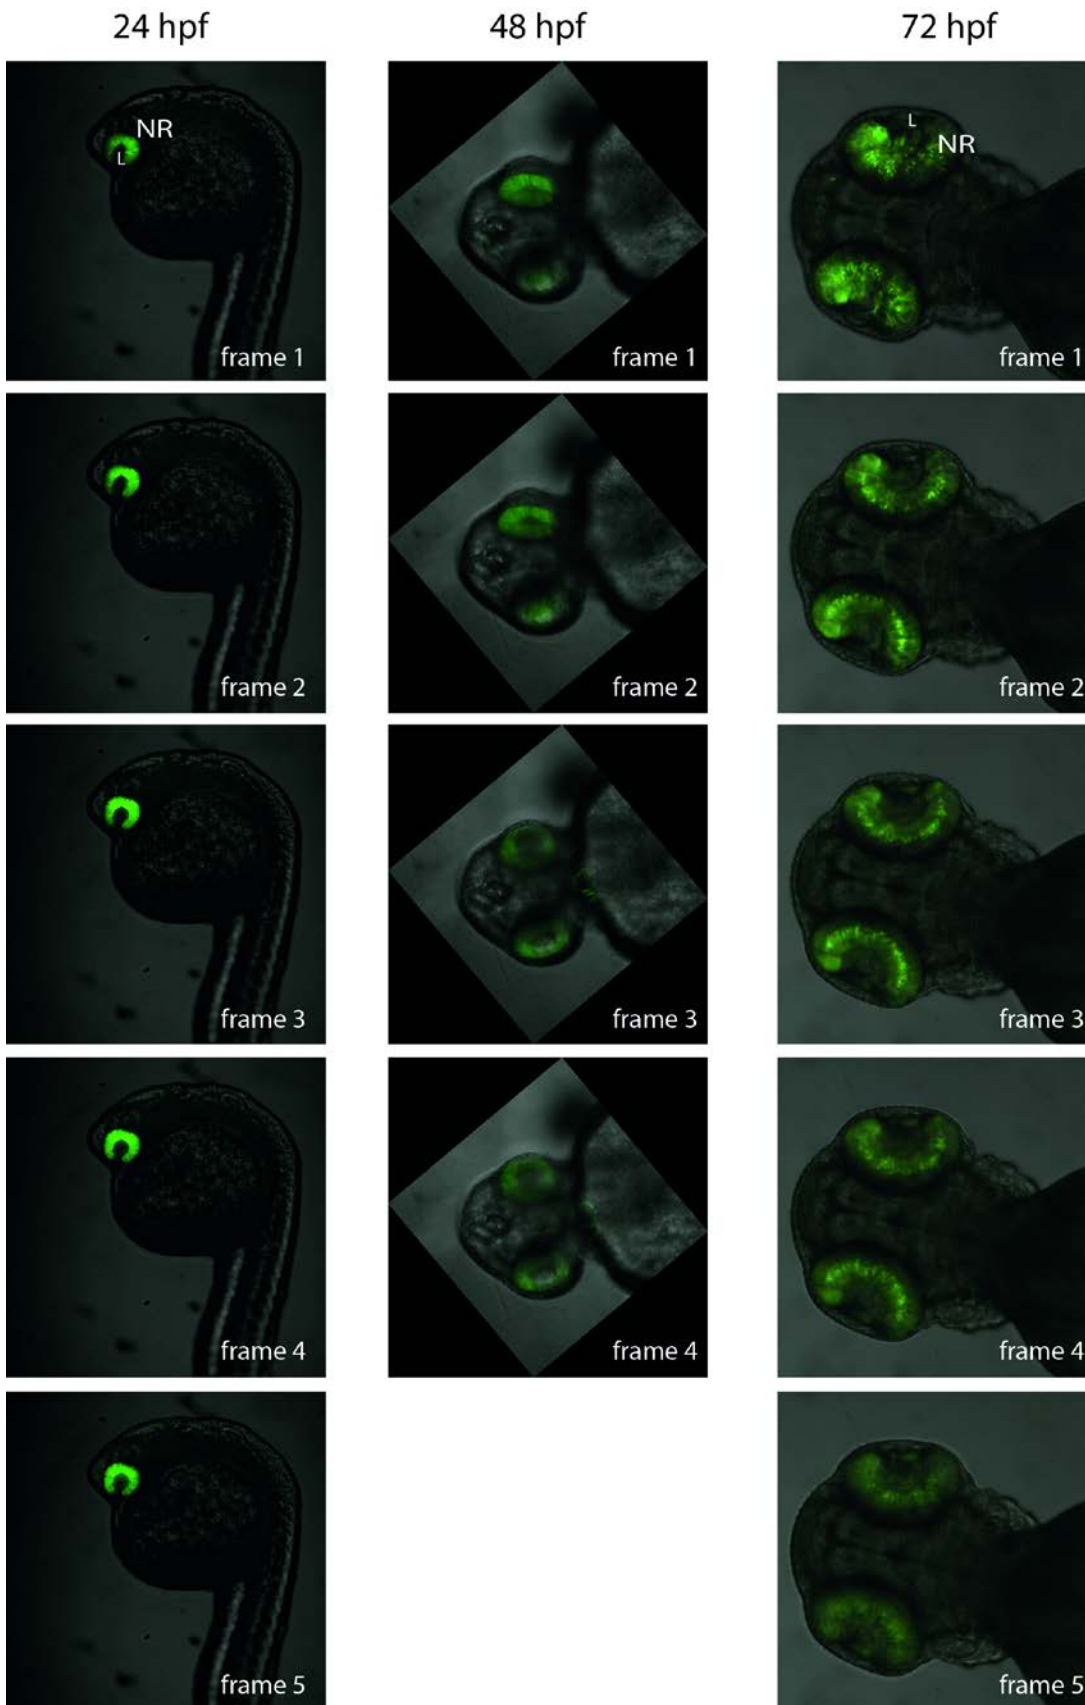

**Figure S3:** Optical sections of transgenic zebrafish embryos with the LjPax6 $\beta$  putative NRE element. A selection of ordered confocal z-stack images are shown for embryos at 24hpf, 48hpf and 72hpf.

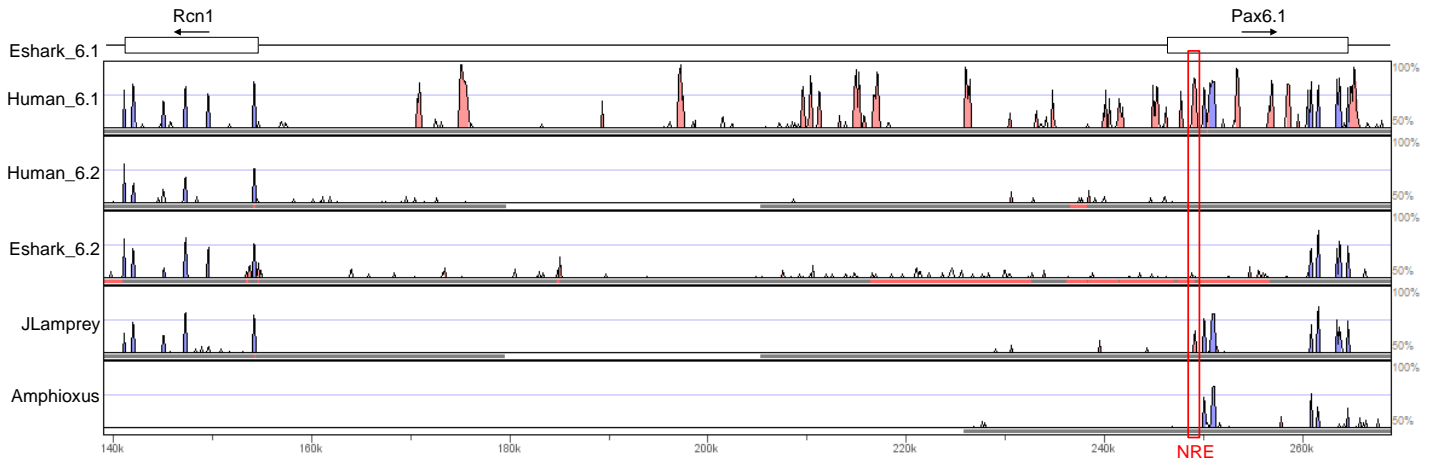

**Figure S4:** Appearance of a large number of conserved non-coding elements (CNEs) in gnathostomes after divergence from the lamprey. VISTA plot of the SLAGAN alignment of the elephant shark Pax6.1 upstream locus against Pax6 loci from human, elephant shark, the lamprey pax6 $\beta$  locus and the amphioxus pax6 locus. In contrast to the many CNEs conserved between the elephant shark and human Pax6.1 loci (pink shaded peaks; conserved coding sequences: blue shaded peaks), no CNEs are found in the other alignments apart from the lamprey Pax6 $\beta$  NRE (highlighted by red box). Note that there is no PAX6 gene in the virtual ‘human\_6.2’ locus.

**Pax6a transcripts in the RNA-seq transcript data of the brook lamprey (*Lampetra planeri*) pancreas.**

>TRINITY\_DN417217\_c0\_g1\_i1 len=414 (Number of reads: 18;

Transcripts per million (TPM) = 0.08)

CACAGCGGCGTGAACCAGCTGGGAGGAGTGTTTCGTCAACGGGCGGCCGCTCCCCGACTCCATCCGC  
CAGAAGATCGTCGAGTTAGCGCACAGCGGCGCGCGGCCCTGCGACATCTCCCGCATCCTGCAGGTG  
TCCAACGGCTGCGTGAGCAAGATCCTGGGCCGCTACTACGAGACGGGCTCCATCCGCCCGCGCGCC  
ATCGGCGGCAGCAAGCCGCGCGTGGCCACGCCGAGGTGGTGGGGAAGATCGCGCAGTACAAGCGG  
GAGTGCCCTCCATCTTCGCGTGGGAGATCCGCGACCGCCTCCTCTCCGACGGGGTTTGCACCAGC  
GACAACATCCCCAGCGTCTCCTCCATCAACCGGGTGCTGCGCAACCTGGCGAGCGAGAAGCAGGGG  
ATGGGGGGCACCGACGGC

>protein

HSGVNQLGGVFNVRPLPDSIRQKIVELAHSGARPCDISRILQVSNGCVSKILGRYYETGSIRPRA  
IGGSKPRVATPEVVGKIAQYKRECPSIFAWEIRDRLLSDGVCTSDNIPSVSSINRVLRNLASEKQG  
MGGTDG

>TRINITY\_DN125441\_c0\_g1\_i1 len=393 [TPM = 0.22]

AGCCACATCCCCATCAGCAGCAACTTCAGCGCGGGGGTCTACCAGCCCCTGGCGCAGCCCCGCGGCT  
CCCGGCGCGATGCTGGGCCGCGAGCGACTCGATGCTCGGGGGCTCGTACGGGGCTCTACCCTCCATG  
CCCAGCTTCAGCATGGCGGGGAACCTCCCCGTGCAGCCC GGCGTGGGCACGCAGACGGCCTCCTAC  
TCGTGCATGCTGCCCTCCAACCCCGCGTGTCTTCGCGCGCCTACGACACGTACACGCCGCCA  
CACATGCAGGCGGGCCACATGGGCACGGGGCCCTCCTCCACGGGGCTCATCTCCCCGGGGTCTCG  
GTTCCCGTGCAGGTGCCTGGTACTGACCCGGATCTCCCCAATACTGGCCGCGTCTACAGTAG

>protein

SHIPISSNFSAGVYQPLAQPAAPGAMLGRSDSMLGGSYGALPSMPSFSMAGNLPVQPGVGTQTASY  
SCMLPSNPAVSSSRAYDTYTPPHMQAGHMGTPSSTGLISPGVSVVPVQVPGTDPDLPQYWPRLQ



**Full-length sequence of the Lj\_Pax6 $\beta$  NRE fragment used to make reporter transgenic zebrafish**

**GGAGATCGTGATGGAGGTGTCCAAGACGCGACCGTGCCCGAGTCCGTGTCATCTGTGTGTGGGTGG  
GTGTCGTGGGGGGGGGGGGGGTTTGGGAAGTGTGTCTGTATGGCGGGCGGGGTGGCCGTGGTGCT  
AGATGATGATGATGATGGTGACGACGGTTTGTAGGGAAGGATGGCGACAAGAGTTGTGGAGATGGA  
GGAGGAAGGGGAGGGGGGGGTGAGAGAAGAGAGAAGAAGGGGGGGGGGTGAAACGTGCGCCGCATC  
GCCACTCGGCAGTCGCTCGCCCCGGGCTGCAAAAAAAAAATCCACCCCCCCCCCACCACCACCACCA  
CCACAACCTTGAAGCAAACCTTGTGACGCGATGTGACAAGGCTGGCAATGCCGACTCTGCGCGCTGGA  
GCGTGCCTAACGCGCCGTGACGACCTCGGCTTATTTGGGAAAATTAGGCTCAAACCTGACGTCTGG  
ATGGCTTTATTCGGAAGACAAATGTCACACGGCCTCATCGTTCCACAGCTCCGCTTCCCCCCCCC  
CCCAACTTATATCGGGTCCGGGAGGGAGCTTTGGAGTCGCACTCGGAGGAGTCTCGCGGACGAAGC  
CGCGGCTGGCGCGCGCGCCCGCCGTTGATCGCGCGCGCGGACACCCCCCCCCCCCCCCCCAGTACC  
GTAGCAGCCTTCGCTTCCTCCTGAGCCCTGAGCCAGATCGGGCAGATCGCCAGTTTTATTTGTT  
CTTCTTCTTCGTAACGCCACCCGTCGCATTCGCTGCTGCCTGTCTCTCCCCGCGTGAGTCCCGG  
GACGCTGGCGAGGGGACTGCCGCTGCGGGAGATCGGGCGGGGCAGACGGGCAGCCGGACGTGCTTG  
TTAGACGGTACACGTGGGGT**
